1 Do MOXFQ scores change over time? A retrospective study of  
2 podiatric surgery outcomes.

3  
4 **Victoria North**<sup>1,2</sup> BSc(Hons), MSc  
5 Specialist Podiatrist  
6 [vici\\_north@yahoo.co.uk](mailto:vici_north@yahoo.co.uk)

7  
8 **Ian Reilly**<sup>1,3</sup> MSc, FRCPodS, DABPMi, FFPM RCPS(Glasg)  
9 Consultant Podiatric Surgeon/Associate Lecturer  
10 [ianreilly@nhs.net](mailto:ianreilly@nhs.net)

11  
12 **Andy Bridgen**<sup>3</sup>, BSc(Hons), MSc, PhD  
13 Senior Lecturer  
14 [a.bridgen@hudds.ac.uk](mailto:a.bridgen@hudds.ac.uk)

15  
16 **Anthony Maher**<sup>4</sup>, BSc, MSc, FRCPodS  
17 Consultant Podiatric Surgeon  
18 [anthony.maher@nottshc.nhs.uk](mailto:anthony.maher@nottshc.nhs.uk)

19  
20 1. Department of Podiatric Surgery  
21 Clinical Lead  
22 Northamptonshire Healthcare Foundation NHS Trust

23  
24 2. Private Practice  
25 Zest AHP Ltd, Oxford.

26  
27 3. Department of Podiatry  
28 University of Huddersfield

29  
30 4. Department of Podiatric Surgery  
31 Clinical Lead  
32 Nottinghamshire Healthcare NHS Foundation Trust

33

NOTE: This preprint reports new research that has not been certified by peer review and should not be used to guide clinical practice.

34 **Abstract**

35 **Background:** Recording patient-reported outcome measurements six months after surgery  
36 using PASCOM-10 is common practice in podiatric surgery in the United Kingdom. This study  
37 aims to establish if the health-related quality of life after foot surgery is changed at the 12-  
38 month point.

39 **Method:** An audit of patient-reported outcomes following foot surgery was undertaken.  
40 Electronic case notes were examined, and 236 patients were identified over 1 year. Patients  
41 completed the Manchester Oxford Foot/Ankle Questionnaire (MOXFQ) pre-surgery, at six  
42 months post-operatively (in person/telephone conversation) and were then invited by letter to  
43 complete this again at 12 months post-operatively.

44 **Results:** 91 participants (39%) completed both post-operative questionnaires (66 females 25  
45 males), 45% completed a six-month questionnaire only and 61% completed a 12-month  
46 questionnaire. The results demonstrate a significant score change between the three time  
47 points and across the three MOXFQ domains of walking/standing, pain and social interaction  
48 (0.353,  $F [6, 356] = 40.59$ ,  $p < .001$ ), and a further interaction with gender (0.435,  $F [6, 352] =$   
49  $30.23$ ,  $p < .001$ ). An average, positive change in health-related quality of life (HRQOL) across  
50 all domains was the greatest from pre-surgery to six months post-surgery at 78% improved,  
51 and then decreased to 62% improved at 12 months post-surgery. Females experience lower  
52 HRQOL before surgery, at 6 months and at 12-month post-operation time points but gain the  
53 greatest improvement over pre-operative scores at 30%.

54 **Conclusion:** A patient-centred approach is key in foot surgery, patient-reported health-related  
55 quality of life changes significantly at different time points. In this review, the overall health-  
56 related quality of life improved with surgery at the six- and 12-month point, but with some  
57 deterioration at 12 months. A short period of recovery may not yield genuine long-term patient-  
58 reported outcomes, and an increase to a minimum of 12 months is recommended from the  
59 more common six months. However, the different methods of collecting post-operative data  
60 at various time points may have had an influence on scores.

61

62 **Level of clinical evidence:** 4

63

64 **Keywords:** Health-related quality of life, foot surgery, outcomes, quality of life, patient-centred  
65 approach, HRQOL, MOXFQ, PASCOM, PROM.

66

67 *This paper is presented as a PrePrint somewhat later than hoped (see data retrieval dates)*  
68 *due to delays in gaining approval for a print version.*

69 **Introduction.**

70 Foot and ankle pathology account for a significant percentage of all orthopaedic  
71 interventions. Podiatric surgery is concerned with the surgical management of foot  
72 and ankle conditions and has grown in scope of practice since the encouragement of  
73 day case surgery in the 1990s (1), with day surgery saving the NHS around £2 billion  
74 from 1998 to 2013 (2).

75

76 The NHS takes a patient-centred approach to health care with an estimated 1.5 million  
77 people being supported daily by health services in the UK (3). There are numerous  
78 health outcome tools available for use in foot surgery. Patient-reported outcomes  
79 measures (PROMs) that are appropriately designed and condition-specific, which are  
80 reliable and valid, focus on the health concerns of most relevance to patients, such as  
81 pain, function, and mobility. Collectively these factors form a patient's health-related  
82 quality of life (HRQOL) (4,5). The tools must be responsive to change, reproducible  
83 and reflective of the patient's perception (6), and some authors suggest a shift toward  
84 the consistent use of a smaller number of valid, reliable, and clinically valuable scales  
85 (7).

86

87 The MOXFQ is the preferred standard instrument of the Royal College of Podiatry (8),  
88 utilised through the Podiatric Audit of Surgery and Clinical Outcome Measurement  
89 (PASCOS-10) system which the college recommends for all Podiatric Surgery  
90 teaching units in the UK (6). The MOXFQ is completed pre-surgery and six months  
91 post-operative as standard (9) but there are no formal guidelines or best practice  
92 available on recommended time intervals, with limited studies evaluating time points  
93 as a primary indicator for outcomes. However, it should be noted that the original  
94 research developing the MOXFQ utilised a cohort of foot surgery patients with post-  
95 operative follow-up set at 12 months.

96

97 An initial scoping literature search by the lead author highlighted 44 articles concerned  
98 with the outcomes of foot surgery within a two-year period. Of 23 unique tools, the top  
99 three were the American Orthopaedic Foot & Ankle Society (AOFAS) (10), the Visual  
100 Analogue Scale (VAS) (11) and the Manchester-Oxford Foot/Ankle Questionnaire  
101 (MOXFQ – see Appendix 1) (12), which together account for 66% usage of all the tools  
102 used. In 2018, a systematic review of five years of data by Shazadeh Safavi et al. (13)  
103 reported on 76 tools; in 2019, the review by Lakey & Hunt (14) reported on 89 tools.

104

105 AOFAS has not been demonstrated to be either valid or reliable, and in 2011 the  
106 AOFAS organisation released a statement recommending discontinuing the use of the  
107 system (15). The VAS is a generic instrument, non-specific to a disease or foot region,  
108 with low specificity for minimally clinically important differences (MCID) (14). The  
109 MOXFQ, by comparison, has been tested for validity, reliability, and responsiveness  
110 in the context of foot surgery (16). Its use has increased in popularity from 1% use in  
111 the review by Hasenstein et al. (7) in 2017 to 39% in the senior author's initial search.  
112 The MOXFQ questionnaire has been tested and validated for use with all foot surgery  
113 (16). There are 16 questions using a Likert scale, with responses assigned to one of  
114 three domains: walking/standing (WS), pain (P) and social interaction (SI).

115

116 Patients' health-related quality of life (HRQOL) is liable to change with time, although  
117 data from studies are conflicting. Though not directly relevant, the retrospective study  
118 of patient satisfaction by Taylor et al. (9) using the PASCUM-10 patient satisfaction  
119 questionnaire (PSQ-10) with a follow-up time ranging from seven to 82 months found  
120 no statistically significant change to satisfaction scores at differing time points.  
121 However, the authors advised felt six months was adequate.

122

123 This study aimed to determine if the patient's health-related quality of life as measured  
124 by the MOXFQ changes after foot surgery with differing time intervals in a cohort of  
125 podiatric surgery patients. The hypothesis this study sets out is that there will be no  
126 differences in patient health-related quality of life after foot surgery with differing time  
127 intervals.

128

## 129 **Method**

130 The study is a retrospective, quantitative audit to assess patient health-related quality  
131 of life before surgery and at six and 12 months in one NHS podiatric surgery centre  
132 (Northamptonshire) in the UK. Two hundred and sixty-nine participants were identified  
133 (convenience sample) from a retrospective screen of the PASCUM-10 surgical  
134 database from January to December 2019. The authors considered that the 12-month  
135 period would generate an acceptable cohort of participants. The participants were  
136 then cross-checked to ensure that pre-operative MOXFQ values had been recorded.  
137 Following this, 33 blank forms, duplicate entries and data errors were excluded. A  
138 total of 236 patients were included in the cohort; see flow chart in Figure 1.

139

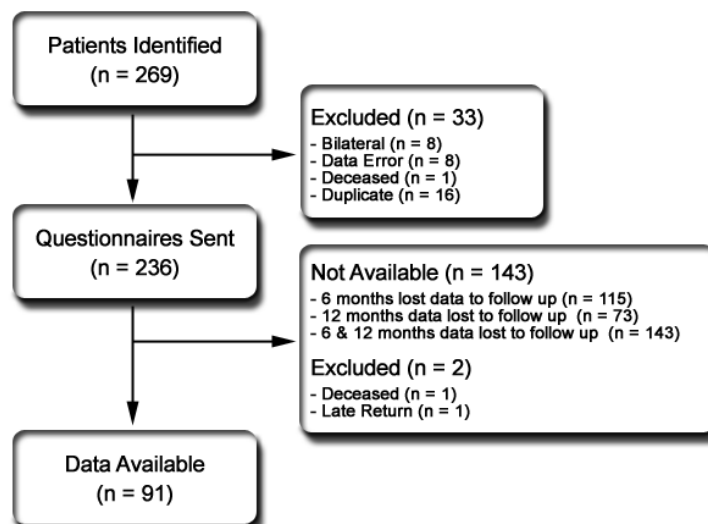

140

141

Figure 1: participant flowchart

142

143 Two hundred thirty-six questionnaires were prepared for the 12-month point for all  
 144 participants; these questionnaires were sent through the post with free postage returns  
 145 at the appropriate 12-month post-surgery interval. The following information was  
 146 extracted from PASCUM-10 and exported to a Microsoft Excel spreadsheet for further  
 147 analysis: gender, age, surgical complications, type of foot surgery, anatomic location,  
 148 and MOXFQ pre and six-month values.

149

150 Table 1 shows the 16 MOXFQ questions segregated by the three domains of  
 151 walking/standing (WS), pain (P) and social interaction (SI) and the associated  
 152 Minimum Clinically Important Difference (MCID). That is the threshold score at which  
 153 the patient notices and actual rather than statistical improvement in HRQOL. The  
 154 allocation of questions to each domain means they have differing totals; percentages  
 155 are calculated and used for comparison.

156

157 Table 1: MOXFQ Question numbers, categories and MCID (12)

| Question Numbers    | Category           | MCID |
|---------------------|--------------------|------|
| 2, 3, 4, 5, 6, 7, 8 | walking/standing   | 16   |
| 1, 11, 12, 15, 16   | pain               | 12   |
| 9, 10, 13, 14       | social interaction | 24   |

158

159 Data analysis was conducted in Microsoft Excel and Access, and all descriptive  
160 statistics using SPSS version 26.0 (IBM Corp) following the parsimonious model,  
161 significance level .05, confidence interval 95%. Analysis of variance (ANOVA) was  
162 used with the Bonferroni adjustment. The Huynh-Feldt correction was used where the  
163 Mauchly test of sphericity was violated, and where an interaction effect was found, an  
164 analysis of simple effects was performed. Tests of within subjects' effects used the  
165 Wilks Lambda test.

166

167 Repeated measures mixed analyses of variance were performed on all 91 participants  
168 with data from all time points to analyse if there were any significant changes in time  
169 or differences in outcome between the treatment groups for domains of WS, P and SI,  
170 age, gender, or treatment type, location, and sequelae over time. The variables  
171 deemed to be of interest for this research included the MOXFQ domains of WS, P and  
172 SI alongside gender and all time points (0, 6, and 12 months).

173

## 174 **Results**

175 163 questionnaires were returned (61%), one deceased, one late return and 73 lost to  
176 follow-up. The 6-month data were collected during the post-operative appointment.  
177 These appointments were not available after April 2020 due to Corona virus  
178 restrictions and thus were sent out through the post. This affected 76 participants.  
179 120 questionnaires were completed (45%), 115 lost to follow-up. 91 participants  
180 (39%) completed both six-month and 12-month questionnaires (66 female and 25  
181 male. The mean age is 64, range 35-93 years). The anatomical location of the  
182 surgical procedure on the foot was too small to be analysed individually and was  
183 grouped (forefoot hallux, forefoot and midfoot/rearfoot). Surgical procedures and post-  
184 operative complications had insufficient numbers to enable statistical analysis (16).  
185 There were 76 procedure variations. Table 2 summarises the mean descriptive  
186 statistics for the MOXFQ at all time points and genders.

187

188 Table 2: mean descriptive statistics for the MOXFQ

| Domain             |                  |               | Pre-surgery |       | 6/12  |       | 12/12 |       | Pre-surgery to 6/12 |        | 6/12 to 12/12 |       | Pre-surgery to 12/12 |        | Significance test<br><i>p</i> |
|--------------------|------------------|---------------|-------------|-------|-------|-------|-------|-------|---------------------|--------|---------------|-------|----------------------|--------|-------------------------------|
|                    |                  |               | Mean        | SD    | Mean  | SD    | Mean  | SD    | Mean                | SD     | Mean          | SD    | Mean                 | SD     |                               |
| Walking/Standing   | Total WS         | <i>n</i> = 91 | 54.98       | 26.58 | 11.63 | 20.00 | 19.76 | 25.83 | -43.35              | -6.57  | 8.13          | 5.82  | -35.22               | -0.75  | <b><i>P</i> &lt; .001</b>     |
|                    | Age              | <i>n</i> = 91 |             |       |       |       |       |       |                     |        |               |       |                      |        | <i>P</i> = .882               |
|                    | Gender F         | <i>n</i> = 66 | 58.46       |       | 10.65 |       | 17.99 |       | -47.80              |        | 7.33          |       | -40.47               |        | <i>P</i> = .833               |
|                    | Gender M         | <i>n</i> = 25 | 45.80       |       | 14.20 |       | 24.44 |       | -31.60              |        | 10.24         |       | -21.36               |        |                               |
|                    | Forefoot         | <i>n</i> = 34 | 59.53       | 26.21 | 12.62 | 21.13 | 22.82 | 27.76 | -46.91              | -5.07  | 10.20         | 6.63  | -36.71               | 1.56   | <i>P</i> = .144               |
|                    | Forefoot/hallux  | <i>n</i> = 40 | 49.88       | 25.63 | 11.33 | 21.06 | 21.75 | 26.81 | -38.55              | -4.57  | 10.42         | 5.74  | -28.13               | 1.18   |                               |
|                    | Midfoot/rearfoot | <i>n</i> = 17 | 57.88       | 28.93 | 10.35 | 15.62 | 8.94  | 16.01 | -47.53              | -13.30 | -1.41         | 0.38  | -48.94               | -12.92 |                               |
| Pain               | Total P          | <i>n</i> = 91 | 56.48       | 21.52 | 12.80 | 20.06 | 21.98 | 22.78 | -43.68              | -1.46  | 9.18          | 2.72  | -34.50               | 1.26   | <b><i>P</i> &lt; .001</b>     |
|                    | Age              | <i>n</i> = 91 |             |       |       |       |       |       |                     |        |               |       |                      |        | <i>P</i> = .424               |
|                    | Gender F         | <i>n</i> = 66 | 58.86       |       | 10.76 |       | 20.23 |       | -48.11              |        | 9.47          |       | -38.64               |        | <i>P</i> = .651               |
|                    | Gender M         | <i>n</i> = 25 | 50.20       |       | 18.20 |       | 26.60 |       | -32.00              |        | 8.40          |       | -23.60               |        |                               |
|                    | Forefoot         | <i>n</i> = 34 | 57.06       | 21.95 | 11.47 | 18.89 | 22.06 | 24.00 | -45.59              | -3.06  | 10.59         | 5.11  | -35.00               | 2.05   | <i>P</i> = .408               |
|                    | Forefoot/hallux  | <i>n</i> = 40 | 55.88       | 21.33 | 13.75 | 21.48 | 25.38 | 22.60 | -42.13              | 0.15   | 11.63         | 1.12  | -30.50               | 1.27   |                               |
|                    | Midfoot/rearfoot | <i>n</i> = 17 | 56.76       | 22.36 | 13.24 | 19.92 | 13.82 | 19.65 | -43.52              | -2.44  | 0.58          | -0.27 | -42.94               | -2.71  |                               |
| Social Interaction | Total SI         | <i>n</i> = 91 | 47.99       | 23.29 | 10.20 | 17.79 | 18.35 | 23.20 | -37.79              | -5.51  | 8.15          | 5.42  | -29.64               | -0.09  | <b><i>P</i> &lt; .001</b>     |
|                    | Age              | <i>n</i> = 91 |             |       |       |       |       |       |                     |        |               |       |                      |        | <i>P</i> = .653               |
|                    | Gender F         | <i>n</i> = 66 | 50.32       |       | 9.76  |       | 17.05 |       | -40.56              |        | 7.29          |       | -33.27               |        | <i>P</i> = .854               |
|                    | Gender M         | <i>n</i> = 25 | 41.84       |       | 11.36 |       | 21.80 |       | -30.48              |        | 10.44         |       | -20.04               |        |                               |
|                    | Forefoot         | <i>n</i> = 34 | 47.38       | 24.47 | 11.62 | 18.79 | 20.71 | 25.97 | -35.76              | -5.68  | 9.09          | 7.18  | -26.67               | 1.50   | <i>P</i> = .622               |
|                    | Forefoot/hallux  | <i>n</i> = 40 | 49.50       | 22.48 | 10.40 | 18.63 | 20.40 | 22.80 | -39.10              | -3.86  | 10.00         | 4.18  | -29.10               | 0.32   |                               |
|                    | Midfoot/rearfoot | <i>n</i> = 17 | 45.65       | 23.92 | 6.88  | 13.78 | 8.82  | 15.84 | -38.77              | -10.14 | 1.94          | 2.06  | -36.83               | -8.08  |                               |

189

190 Mauchly's test indicated that the assumption of sphericity had been violated in all  
 191 findings, and the degrees of freedom were subsequently corrected using Huynh-Feldt  
 192 estimates of sphericity, results are given via a variable for the three MOXFQ domains  
 193 of WS, P and SI.

194

195 There was no correlation between the age of the participant and the values at different  
 196 time points,  $F(1.69,149.99) = .092$ ,  $p = .882$ ,  $F(1.74,154.5) = .827$ ,  $p = .424$ ,  
 197  $F(1.58,136.77) = .351$ ,  $p = .653$  WS, P and SI respectively. The results show that  
 198 there were no significant effect of anatomic location of surgery with any time point and  
 199 the three MOXFQ domains,  $F(3.42,150.42) = 1.79$ ,  $p = .144$ ,  $F(3.50,153.79) = .99$ ,  $p$   
 200  $= .41$ ,  $F(3.17,139.57) = .61$ ,  $p = .622$  WS, P and SI respectively. Age and anatomic  
 201 location had no effect on MOXFQ scores.

202

203 A significant interaction was found with all three MOXFQ domains over all the time  
 204 points (pre-surgery, six- and 12 months), and a correlation was found. Wilks' Lambda  
 205  $= 0.353$ ,  $F(6, 356) = 40.59$ ,  $p < .001$ , and for all time points in combination, shown in  
 206 Figure 2, Figure 3 and Table 3.

207

208



209 Table 3: Breakdown of the analysis of MOXFQ scores across the domains

| <i>n</i> = 91 | Multivariate                     | Univariate                           |                                    |                                      |
|---------------|----------------------------------|--------------------------------------|------------------------------------|--------------------------------------|
|               |                                  | Walking/Standing                     | Pain                               | Social Interaction                   |
| Time Points   | $F(6, 356) = 40.59, P < .001$    | $F(1.67, 149.90) = 115.15, P < .001$ | $F(1.72, 155.2) = 157.5, P < .001$ | $F(1.59, 140.22) = 117.93, P < .001$ |
| Gender        | $F(6, 352) = 30.23, P < .001$    | $F(1.72, 153.27) = 4.773, P = .013$  | $F(1.78, 158.54) = 5.01, P = .010$ | $F(1.6, 142) = 2.898, P = .070$      |
| Age           | $F(6, 352) = .574, P = .75$      | $F(1.69, 149.99) = .092, P = .882$   | $F(1.74, 154.51) = .827, P = .424$ | $F(1.58, 140.26) = .351, P = .653$   |
| Location      | $F(12, 460.65) = .111, P = .353$ | $F(3.42, 150.42) = 1.79, P = .144$   | $F(3.50, 153.79) = .99, P = .41$   | $F(3.17, 139.57) = .61, P = .622$    |

Multivariate results reported using Wilks Lambda. **Bold is significant to  $P < .05$ .**

210

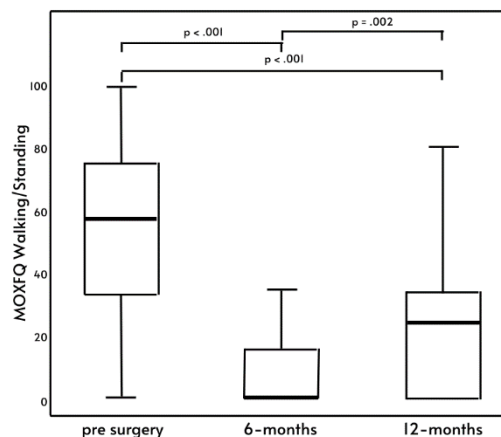

211

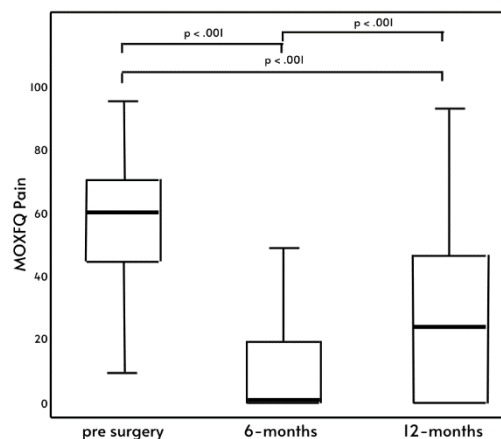

212



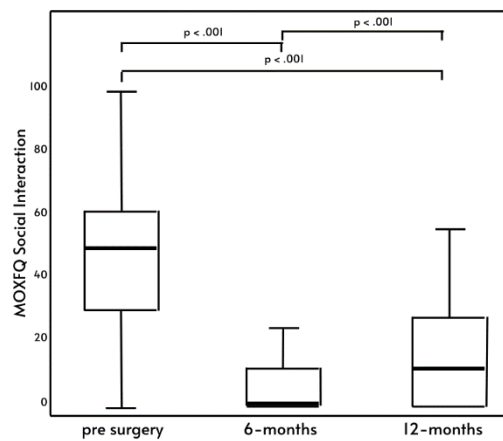

213  
214  
215

Figure 2 (a, b, c): Domains p-values at time points created using SPSS

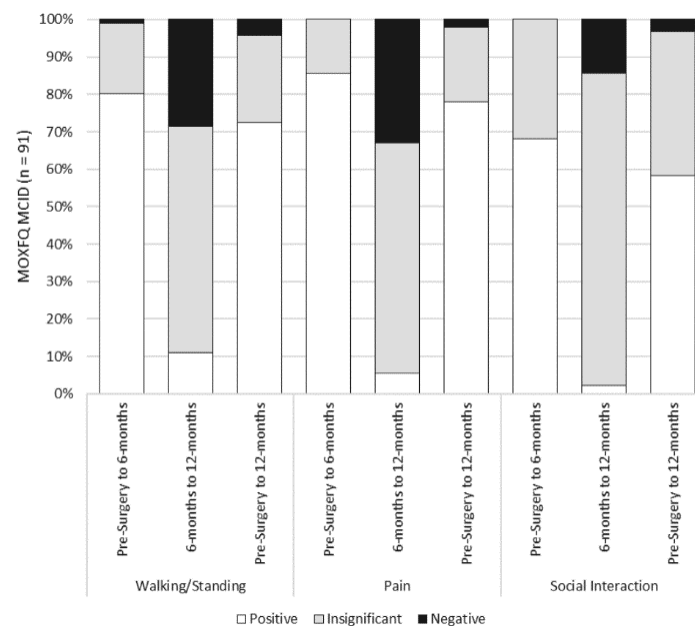

216  
217  
218

Figure 3: MCID change in domains at time points

219 There was a significant interaction between gender and time points for domains WS  
220 and P,  $F(1.72,153.27) = 4.773, p = .013$ ,  $F(1.78,158.54) = 5.01, p = .010$  (Table 4),  
221 however there was no significant effect with SI and time points, WS, P and SI  
222 ( $P=0.833, .651, .854$  respectively). The interaction of time and gender is non-  
223 significant, Wilks' Lambda = 0.935,  $F(6,352) = 2.02, p = 0.62$ , although there was a  
224 significant effect of gender with linear effect at all time points, Wilks' Lambda = 0.435,  
225  $F(6,352) = 30.23, p < .001$ . Time is shown in Figures 4 and 5.

226  
227

228 Table 4: p-value of the analysis of MOXFQ scores across the three domains.

|                      | Between subject effects |                 |                    |
|----------------------|-------------------------|-----------------|--------------------|
|                      | Walking/Standing        | Pain            | Social Interaction |
| Pre-surgery to 6/12  | <i>P</i> < .001         | <i>P</i> < .001 | <i>P</i> < .001    |
| 6/12 – 12/12         | <i>P</i> = .002         | <i>P</i> < .001 | <i>P</i> < .001    |
| Pre-surgery to 12/12 | <i>P</i> < .001         | <i>P</i> < .001 | <i>P</i> < .001    |
| Gender               | <i>P</i> = .833         | <i>P</i> = .651 | <i>P</i> = .854    |

229

230 Table 5: MCID Percentage Change in domain scores at all time points

| Time Points      | Walking/Standing Domain |          |                    | Pain Domain |          |                    | Social Interaction Domain |          |                    |
|------------------|-------------------------|----------|--------------------|-------------|----------|--------------------|---------------------------|----------|--------------------|
|                  | Positive                | Negative | Insignif-<br>icant | Positive    | Negative | Insignif-<br>icant | Positive                  | Negative | Insignif-<br>icant |
| Pre to 6 months  | 80%                     | 1%       | 19%                | 86%         | 0%       | 14%                | 68%                       | 0%       | 32%                |
| Pre to 12 months | 73%                     | 4%       | 23%                | 78%         | 2%       | 20%                | 58%                       | 3%       | 38%                |
| 6 to 12 months   | 10%                     | 21%      | 69%                | 5%          | 33%      | 62%                | 2%                        | 14%      | 84%                |

231

232 Adjustment for multiple comparisons: Bonferroni. Based on estimated marginal

233 means - the mean difference is significant at the .05 level.

234

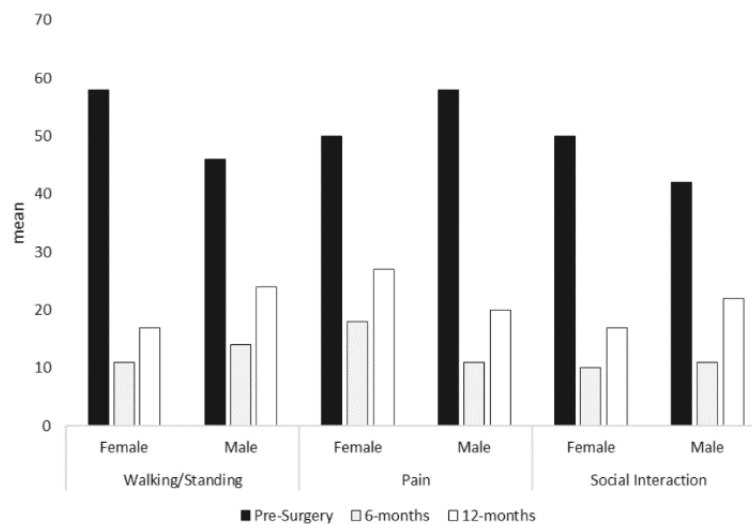

235

236 Figure 4: MOXFQ domain mean scores split by gender

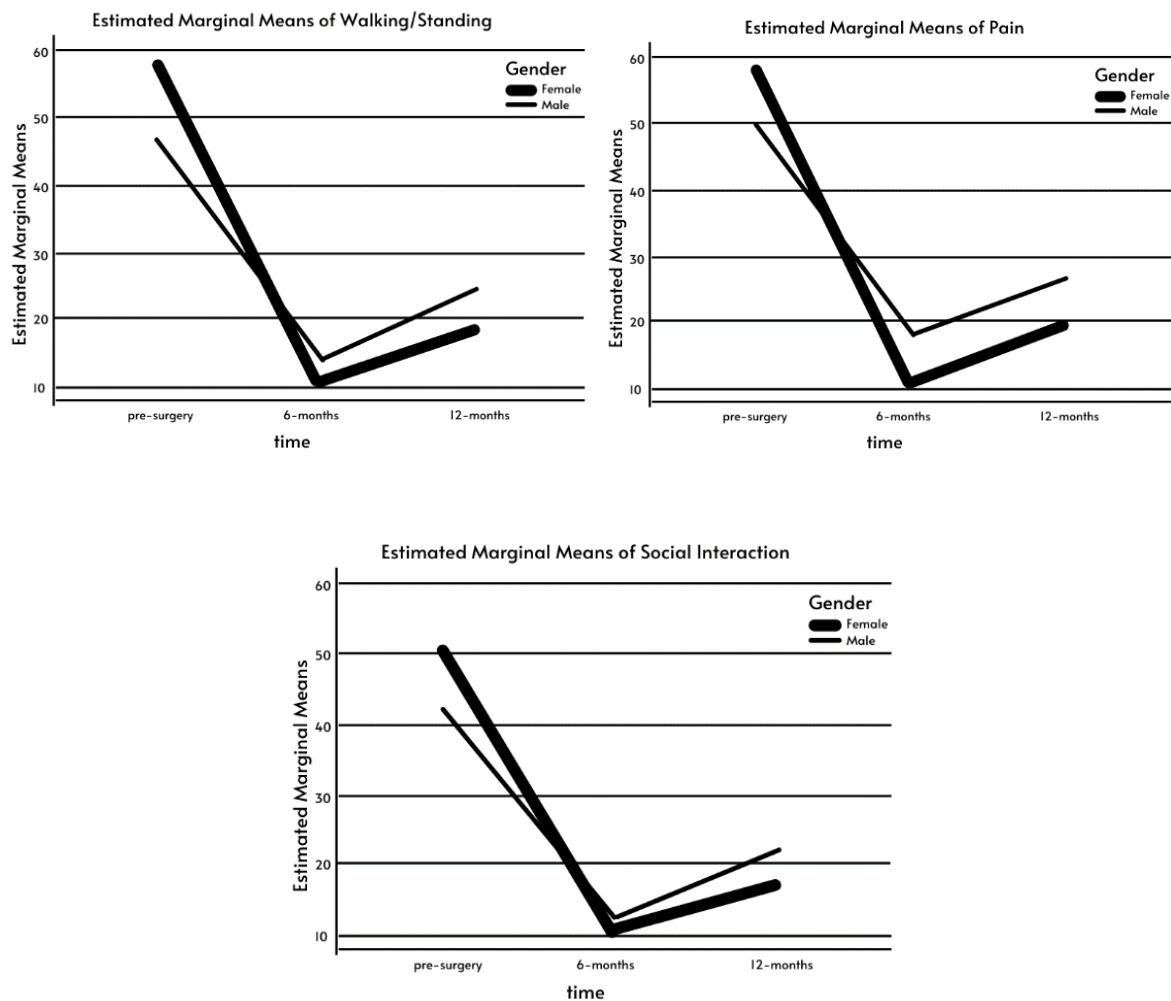

237

238

239

240

Figure 5 (a, b, c): MOXFQ domain scores by gender at time points.

241 Female HRQOL appeared poorer than males across all three domains at pre-surgery  
242 and at 12 months. Female HRQOL from pre-surgery to 6 months shows the greatest  
243 gain ( $p=.013$ ), 82%, 82% and 81% compared to males 69%, 64% and 73%, for WS, P  
244 and SI. From six to 12 months both genders see an increase in MOXFQ scores across  
245 all three domains, equating to a reduction in HRQOL ( $p=0.10$ ).

246

## 247 Discussion

248 The three MOXFQ domains show variations at different time points, all with statistical  
249 significance, and all follow the same trajectory. At six months post podiatric surgery,  
250 patients experience the greatest positive change in HRQOL scores, an average  
251 improvement of 78% across all domains. Health-related quality of life deteriorates  
252 during the time period of six to 12 months after surgery, and at 12 months the HRQOL  
253 score is an average of 62% improved over the preoperative scores.

254

255 The need for assessment of patient-reported outcomes at different time intervals has  
256 been suggested by The Health Foundation (2) which recommends a need for further  
257 research in assessing the quality of health services over time. 12 months is  
258 recommended by Dawson, Coffey et al in their original study looking at MOXFQ  
259 responsiveness and the use of MCID (16). In contrast, the study by Taylor et al. (9)  
260 using only the PASCOP PSQ-10 questionnaire reported positive changes over time  
261 (beyond six months) but concluded that six months is an adequate period to analyse  
262 patient progress and likely representative of the final outcome. Due to the  
263 retrospective nature of data collection, their study was unable to specify exact follow-  
264 up time points, and the sensitivity of the data is unknown.

265

266 The MOXFQ employs three separate domains relevant to foot health to explore  
267 HRQOL, all three domains at all three time points have been found to have significant  
268 findings. Of interest, the improvement in HRQOL appears to peak at six months before  
269 reducing slightly at 12 months. The score changes across the three domains between  
270 six and 12 months were significant however, that reduced 12-month MOXFQ score  
271 still represents an improvement in HRQOL over the pre-operative state.

272

273 From surgery to six months post-operation patients are given guidelines to follow  
274 including activity modification, footwear advice, wound care, and pain management.  
275 At six months post-operation patients are typically discharged and informed to start  
276 returning to normal activity. As patients return to their pre-surgery activities this may  
277 contribute to foot pain as the foot is still arguably healing. That pain may in turn limit  
278 participation in weight-bearing activities or at least make those activities more difficult  
279 which may in turn account for the reduction in domain scores. High-impact and contact  
280 sports in particular report the most negative outcomes following treatment (17).

281

282 An interesting finding of the present study was the observed difference in HRQOL  
283 scores between males and females. At the time of surgery, females had significantly  
284 poorer scores across all three MOXFQ domains than their male counterparts.  
285 Females then went on to see more significant improvement in HRQOL at 6 months  
286 before deteriorating slightly at 12 months. The study by MacInnes and Roberts (17)  
287 noted a non-significant mean difference between genders of only 17%, unlike 30% in  
288 this study.

289

290 A number of studies recommend a follow-up longer than six months, as certain  
291 procedures may require longer periods to fully rehabilitate, such as ankle fusions and  
292 getting back into sports (5). Maher and Kilmartin (8) warn that assessing patients early  
293 may not provide a realistic gauge of the ultimate outcome and that for reconstructive  
294 foot surgery patients will continue to improve after 12 months. Taylor et al. (9) discuss  
295 forefoot surgery requiring six months, midfoot and hindfoot six-18 months discharge.  
296 This study was unable to conclude on surgery type for the results and would benefit  
297 from further study in this area.

298

299 The experimenter effect can result in subtle differences in participant treatment. At  
300 the six months point, the surgeon would discuss the outcomes and his thoughts before  
301 requesting the completion of the questionnaire, thus possibly influencing the  
302 participants scoring. The 12-month point questionnaires were completed through the  
303 post. The six month scores may be a direct consequence of the experimenter effect.

304

305 The six month questionnaires have a lower completion number than the 12 month data  
306 and after April 2020 when the unit closed due to the COVID-19 pandemic. The  
307 average 6-month completion of questionnaires for 2019 was 55%, including 63%  
308 before closing dropping to 38% after closure. It is unknown how the missing data may  
309 have affected the results.

310

311 There may be a responder bias from the use of postal questionnaires, with the  
312 additional disadvantage of a low response rate and patients not included owing to  
313 missing follow-up data, a change of address or lack of interest. The authors believe  
314 this is in part due to the study being performed at the height of the COVID-19  
315 pandemic.

316

### 317 **Conclusion**

318 The results of this study demonstrate that at different time points, patients report  
319 different MOXFQ scores. A significant improvement in MOXFQ scores across all three  
320 domains is noted from pre-surgery to six months, with a reduction by the time 12  
321 months have elapsed. The most significant improvement is seen in females compared  
322 to males, with a 30% difference. However, females start and finish with lower health-  
323 related quality of life than men.

324

325 The current six-month point for PROMs to be recorded by the surgical team may not  
326 provide the most accurate result for the patient or clinician. Post-operative recovery  
327 is not simply a period when all wounds heal, and all pain dissipates; it is a period that  
328 may last longer than 6 months. Patients need to be aware that six months may not  
329 provide the optimum recovery, and once the 6-month stage has been reached, it may  
330 take time to settle. Whilst acknowledging that different data collection methods may  
331 have affected scores, this study recommends extending the six-month data collection  
332 point for the MOXFQ questionnaires to twelve months.

333

### 334 **List of figures**

335 Figure 1: participant flowchart

336 Figure 2 (a, b, c): Domains p-values at time points Created using SPSS

337 Figure 3: MCID change in domains at time points

338 Figure 4: Domain means split by gender

339 Figure 5 (a, b, c): Domains by gender at time points

340

### 341 **References**

- 342 1. Maher AJ, Metcalfe SA. A report of UK experience in 917 cases of day care foot  
343 surgery using a validated outcome tool. *The Foot*. 2009;19:6.  
344 <https://doi.org/10.1016/j.foot.2009.01.002>.
- 345 2. Appleby J. Day case surgery: a good news story for the NHS. *BMJ: British*  
346 *Medical Journal*. 2015 Jul 29;351:h4060. <https://www.jstor.org/stable/26522549>.
- 347 3. The King's Fund. *The NHS in a nutshell*. 2020. Available from:  
348 <https://www.kingsfund.org.uk/projects/nhs-in-a-nutshell/NHS-activity> Accessed  
349 05.04.22.
- 350 4. Chow A, Mayer EK, Darzi AW, Athanasiou T. Patient-reported outcome  
351 measures: the importance of patient satisfaction in surgery. *Surgery*. 2009 Sep  
352 1;146(3):435-43. <https://doi.org/10.1016/j.surg.2009.03.019>.
- 353 5. Dawson J, Boller I, Doll H, Lavis G, Sharp RJ, Cooke P, Jenkinson C. Factors  
354 associated with patient satisfaction with foot and ankle surgery in a large  
355 prospective study. *The Foot*. 2012 Sep 1;22(3):211-8.  
356 <https://doi.org/10.1016/j.foot.2012.05.002>.
- 357 6. Maher A. Service Evaluation, outcome measurement and PASCUM-10.  
358 *Podiatry Now*. 2016;December (12):16-19.

- 359 7. Hasenstein T, Greene T, Meyr AJ. A 5-Year review of clinical outcome measures  
360 published in the Journal of the American Podiatric Medical Association and the  
361 Journal of Foot and Ankle Surgery. The Journal of Foot and Ankle Surgery. 2017  
362 May 1;56(3):519-21. <https://doi.org/10.7547/16-157>.
- 363 8. Maher AJ, Kilmartin TE. An analysis of Euroqol EQ-5D and Manchester Oxford  
364 Foot Questionnaire scores six months following podiatric surgery. Journal of  
365 Foot and Ankle Research. 2012;5(1):1-7. [https://doi.org/10.1186/1757-1146-5-  
366 17](https://doi.org/10.1186/1757-1146-5-17)
- 367 9. Taylor NG, Tollafeld DR, Rees S. Does patient satisfaction with foot surgery  
368 change over time? The Foot. 2008;18(2):68-74.  
369 <https://doi.org/10.1016/j.foot.2008.01.003>.
- 370 10. Kitaoka HB, Alexander IJ, Adelaar RS, Nunley JA, Myerson MS, Sanders M.  
371 Clinical rating systems for the ankle-hindfoot, midfoot, hallux, and lesser toes.  
372 Foot & Ankle International. 1994 Jul;15(7):349-53.  
373 <https://doi.org/10.1177/1071100794015007>.
- 374 11. Hayes MH, Patterson DG. Experimental development of the graphic rating  
375 method. Psychological Bulletin. 1921,18:98-99.
- 376 12. Dawson J, Boller I, Doll H, Lavis G, Sharp R, Cooke P, Jenkinson C. The  
377 MOXFQ patient-reported questionnaire: Assessment of data quality, reliability  
378 and validity in relation to foot and ankle surgery, The Foot, 21(2):92-102,  
379 <https://doi.org/10.1016/j.foot.2011.02.002>.
- 380 13. Shazadeh Safavi P, Janney C, Jupiter D, Kunzler D, Bui R, Panchbhavi VK. A  
381 systematic review of the outcome evaluation tools for the foot and ankle. Foot &  
382 Ankle Specialist. 2019 Oct;12(5):461-70.  
383 <https://doi.org/10.1177/1938640018803747>.
- 384 14. Lakey E, Hunt KJ. Patient-reported outcomes in foot and ankle orthopedics.  
385 Foot & Ankle Orthopaedics. 2019 Jul 12;4(3):2473011419852930.  
386 <https://doi.org/10.1177/2473011419852930>.
- 387 15. Pinsker E, Daniels TR. AOFAS position statement regarding the future of the  
388 AOFAS Clinical Rating Systems. Foot & Ankle International. 2011  
389 Sep;32(9):841-2. <https://doi.org/10.3113/FAI.2011.0841>.
- 390 16. Dawson J, Doll H, Coffey J, Jenkinson C. Responsiveness and minimally  
391 important change for the Manchester-Oxford foot questionnaire (MOXFQ)  
392 compared with AOFAS and SF-36 assessments following surgery for hallux



393 valgus. Osteoarthritis and Cartilage. 2007 Aug 1;15(8):918-31.  
394 <https://doi.org/10.1016/j.joca.2007.02.003>  
395 17. MacInnes A, Roberts SC, Kimpton J, Pillai A. Long-term outcome of open plantar  
396 fascia release. Foot & Ankle International. 2016 Jan;37(1):17-23.  
397 <https://doi.org/10.1177/1071100715603189>.

398

### 399 **List of abbreviations**

|                                                                 |            |
|-----------------------------------------------------------------|------------|
| 400 American Orthopaedic Foot & Ankle Society                   | AOFAS      |
| 401 Care Quality Commission                                     | CQC        |
| 402 Foot Function Index                                         | FFI        |
| 403 Health-related quality of life                              | HRQOL      |
| 404 Manchester Oxford foot questionnaire                        | MOXFQ      |
| 405 Minimally clinically important difference                   | MCID       |
| 406 Patient reported outcomes measures                          | PROMs      |
| 407 Podiatric Audit of Surgery and Clinical Outcome Measurement | PASCOM-10  |
| 408 Patient satisfaction questionnaire                          | PSQ-10     |
| 409 Visual analogue scale/foot and ankle                        | VAS/VAS FA |

410

### 411 **Declarations**

412 Ethics approval and consent to participate:

413 Ethical approval for this study was granted on 14.02.20 from the NHFT Research and  
414 Innovation Department in compliance with NHFT's Policy for Conducting Clinical Audit  
415 Projects (CLP019). Further information/documentation is available on request.

416

417 Consent for publication was granted via NHFT Research and Innovation Department.

418

419 Availability of data and material:

420 Availability of data and material: anonymised data on PASCOM-10.

421

422 Competing interests:

423 Anthony Maher was a long-standing member of the Royal College of Podiatry  
424 PASCOM-10 working party.

425

426 Funding:

427 This research received no grant from public, commercial, or not-for-profit funding  
428 agencies.

429

430 Authors' contributions:

431 Author information: IR conceived the aim and format of the paper. VN performed the  
432 literature search and produced the first draft. All authors made substantial  
433 contributions to the final version.

434

435 Acknowledgements:

436 The authors would like to thank John Stephenson (University of Huddersfield) for his  
437 assistance with statistical analysis.

438

439 Author information:

440 Corresponding author – Victoria North: [vici\\_north@yahoo.co.uk](mailto:vici_north@yahoo.co.uk)

441 Northamptonshire Healthcare Foundation NHS Trust, Danetre Hospital, Daventry,  
442 Northamptonshire. NN11 4DY. UK

443 VN: <https://orcid.org/0000-0002-0835-866X>

444 INR: <https://orcid.org/0000-0002-2786-5739>

445 AB: <https://orcid.org/0000-0002-4942-7051>

446 AM: <https://orcid.org/0000-0002-9173-2981>

447

Appendix 1: Manchester Oxford Foot Questionnaire

| Circle as appropriate:<br>RIGHT / LEFT FOOT <sup>1</sup><br>During the past 4 weeks this<br>has applied to me:   | Please tick ✓ one box for each statement |                                                |                                         |                                         |                                         |
|------------------------------------------------------------------------------------------------------------------|------------------------------------------|------------------------------------------------|-----------------------------------------|-----------------------------------------|-----------------------------------------|
|                                                                                                                  | None of<br>the time                      | Rarely                                         | Some of<br>the time                     | Most of<br>the time                     | All of<br>the time                      |
| 1. I have pain in my foot                                                                                        | <input type="checkbox"/>                 | <input type="checkbox"/>                       | <input type="checkbox"/>                | <input type="checkbox"/>                | <input type="checkbox"/>                |
| 2. I avoid walking long distances because of pain in my foot                                                     | <input type="checkbox"/>                 | <input type="checkbox"/>                       | <input type="checkbox"/>                | <input type="checkbox"/>                | <input type="checkbox"/>                |
| 3. I change the way I walk due to pain in my foot                                                                | <input type="checkbox"/>                 | <input type="checkbox"/>                       | <input type="checkbox"/>                | <input type="checkbox"/>                | <input type="checkbox"/>                |
| 4. I walk slowly because of pain in my foot                                                                      | <input type="checkbox"/>                 | <input type="checkbox"/>                       | <input type="checkbox"/>                | <input type="checkbox"/>                | <input type="checkbox"/>                |
| 5. I have to stop and rest my foot because of pain                                                               | <input type="checkbox"/>                 | <input type="checkbox"/>                       | <input type="checkbox"/>                | <input type="checkbox"/>                | <input type="checkbox"/>                |
| 6. I avoid some hard or rough surfaces because of pain in my foot                                                | <input type="checkbox"/>                 | <input type="checkbox"/>                       | <input type="checkbox"/>                | <input type="checkbox"/>                | <input type="checkbox"/>                |
| 7. I avoid standing for a long time because of pain in my foot                                                   | <input type="checkbox"/>                 | <input type="checkbox"/>                       | <input type="checkbox"/>                | <input type="checkbox"/>                | <input type="checkbox"/>                |
| 8. I catch the bus or use the car instead of walking, because of pain in my foot                                 | <input type="checkbox"/>                 | <input type="checkbox"/>                       | <input type="checkbox"/>                | <input type="checkbox"/>                | <input type="checkbox"/>                |
| 9. I feel self-conscious about my foot                                                                           | <input type="checkbox"/>                 | <input type="checkbox"/>                       | <input type="checkbox"/>                | <input type="checkbox"/>                | <input type="checkbox"/>                |
| 10. I feel self-conscious about the shoes I have to wear                                                         | <input type="checkbox"/>                 | <input type="checkbox"/>                       | <input type="checkbox"/>                | <input type="checkbox"/>                | <input type="checkbox"/>                |
| 11. The pain in my foot is more painful in the evening                                                           | <input type="checkbox"/>                 | <input type="checkbox"/>                       | <input type="checkbox"/>                | <input type="checkbox"/>                | <input type="checkbox"/>                |
| 12. I get shooting pains in my foot                                                                              | <input type="checkbox"/>                 | <input type="checkbox"/>                       | <input type="checkbox"/>                | <input type="checkbox"/>                | <input type="checkbox"/>                |
| 13. The pain in my foot prevents me from carrying out my work/everyday activities                                | <input type="checkbox"/>                 | <input type="checkbox"/>                       | <input type="checkbox"/>                | <input type="checkbox"/>                | <input type="checkbox"/>                |
| 14. I am unable to do all my social or recreational activities because of pain in my foot                        | <input type="checkbox"/>                 | <input type="checkbox"/>                       | <input type="checkbox"/>                | <input type="checkbox"/>                | <input type="checkbox"/>                |
| 15. During the past 4 weeks how would you describe the pain you usually have in your foot? (please tick one box) | None<br><input type="checkbox"/>         | Very mild<br><input type="checkbox"/>          | Mild<br><input type="checkbox"/>        | Moderate<br><input type="checkbox"/>    | Severe<br><input type="checkbox"/>      |
| 16. During the past 4 weeks have you been troubled by pain from your foot in bed at night? (please tick one box) | No nights<br><input type="checkbox"/>    | Only 1 or 2 nights<br><input type="checkbox"/> | Some nights<br><input type="checkbox"/> | Most nights<br><input type="checkbox"/> | Every night<br><input type="checkbox"/> |

<sup>1</sup>The foot to be assessed may be indicated here. Alternatively, each question may be customised to the right foot with all questions then repeated and customised to the left foot.

Finally, please check that you have answered every question

Thank you very much
